# Supplementary material
Source: HighWire-hosted journal article supplement (http://erj.ersjournals.com/highwire/filestream/113033/field_highwire_adjunct_files/0/ONLINE_DEPOSITORY.pdf)
Supplement: ONLINE_DEPOSITORY.pdf [file ONLINE_DEPOSITORY.pdf]

## ONLINE DEPOSITORY

### Online Depository Table A.

#### Long-term repeatability of BH-nNO, OE-R-nNO and TB-nNO.

|                 | Median (range) number of months between occasions | Mean difference (ppb) | SD    | Upper limit of agreement (ppb) | Lower limit of agreement (ppb) |
|-----------------|---------------------------------------------------|-----------------------|-------|--------------------------------|--------------------------------|
| BH-nNO (N=50)   | 3.0 (0.3 to 48.0)                                 | - 5.1                 | 285.5 | 280.4                          | -290.6                         |
| OE-R-nNO (N=12) | 12.6 (0.6 to 24.3)                                | -20.3                 | 200.5 | 180.3                          | -220.8                         |
| TB-nNO (N=36)   | 12.4 (0.5 to 27.6)                                | 0.4                   | 332.9 | 332.5                          | -331.8                         |

### Online Depository Table B.

#### Cut-off values, sensitivity, specificity and AUC calculated from ROC curves for BH-nNO, OE-R-nNO and TB-nNO.

|                                          | Cut-off, ppb | Sensitivity, % | Specificity, % | AUC  | SE    | 95% CI         |
|------------------------------------------|--------------|----------------|----------------|------|-------|----------------|
| <b>BH-nNO</b><br>(PCD: N=49, HC: N=45)   | 175          | 91.1           | 100            | 0.95 | 0.022 | 0.888 to 0.986 |
| <b>OE-R-nNO</b><br>(PCD: N=35, HC: N=30) | 242          | 94.3           | 100            | 0.97 | 0.023 | 0.895 to 0.996 |
| <b>TB-nNO</b><br>(PCD: N=54, HC: N=52)   | 158          | 94.4           | 100            | 0.97 | 0.019 | 0.910 to 0.991 |

### Online Depository Table C.

Consecutive referrals. Comparison of median (95% CI for the median)) levels of BH-nNO, OE-R-nNO and TB-nNO in discrimination between PCD and non-PCD among 117 patients consecutively referred for PCD work. Numbers are unequal because of different demands to cooperation.

|                 | Referrals without PCD       | Referrals with PCD       | P-value, two-tailed (Wilcoxon rank test) |
|-----------------|-----------------------------|--------------------------|------------------------------------------|
| <b>BH-nNO</b>   | 681 (115 to 1287) ppb, n=46 | 53 (10 to 540) ppb, n=12 | P<0.0001                                 |
| <b>OE-R-nNO</b> | 502 (416 to 626) ppb, n=30  | 21 (4 to 168) ppb, n=6   | P<0.001                                  |
| <b>TB-nNO</b>   | 269 (17 to 1282) ppb, n=83  | 41 (6 to 355) ppb, n= 14 | P<0.0001                                 |

**Online Depository Table D.**

**Consecutive referrals. Sensitivity, specificity, positive predictive value (PPV) and negative predictive value (NPV) when applying cut-off values derived from sub-study 2, in the 117 patients referred for PCD work up. Numbers are unequal because of different demands to cooperation.**

|                        | Cut off (ppb) | False positive rate | False negative rate | Sensitivity | Specificity | PPV  | NPV  |
|------------------------|---------------|---------------------|---------------------|-------------|-------------|------|------|
| <b>BH-nNO (N=58)</b>   | 175           | 2/58<br>(3.4%)      | 1/58<br>(1.7%)      | 0.92        | 0.96        | 0.85 | 0.98 |
| <b>OE-R-nNO (N=37)</b> | 242           | 2/37<br>(8.9%)      | 0/37<br>(0%)        | 1.0         | 0.94        | 0.75 | 1.0  |
| <b>TB-nNO (N=97)</b>   | 158           | 17/97<br>(17.5%)    | 1/97<br>(1.0%)      | 0.93        | 0.80        | 0.43 | 0.99 |
